# Supplementary material for: Calcium ions tune the zinc-sequestering properties and antimicrobial activity of human S100A12
Source: PubMed Central journal article supplement (PMC4762610; doi:10.1039/c5sc03655k), 2015-10-26
Supplement: NIHMS738117-supplement-Graphical_Abstract.pdf [file NIHMS738117-supplement-Graphical_Abstract.pdf]

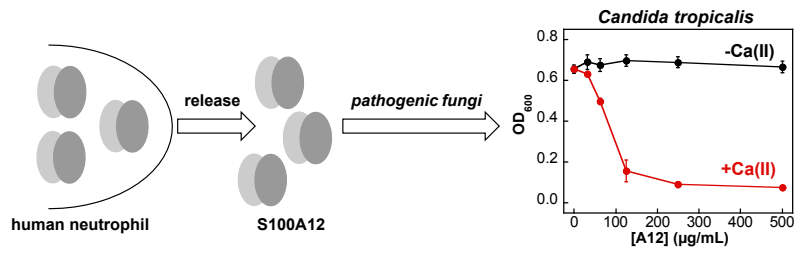

Human S100A12 exhibits Ca(II)-dependent Zn(II)-binding properties and antifungal activity.
